# Supplementary material for: Highly efficient self-healing materials with excellent shape memory and unprecedented mechanical properties
Source: Royal Society of Chemistry journal article supplement (doi:10.1039/d0ta04933f), 2020-01-01
Supplement: d0ta04933f7.pdf [file d0ta04933f7.pdf]

1 **Highly Efficient Self-healing Material with Excellent Shape Memory**  
2 **and Unprecedented Mechanical Properties**

3 **Chaoxian Chen<sup>1</sup>, Siwen Chen<sup>1</sup>, Zhihao Guo<sup>1</sup>, Wanruo Hu<sup>1</sup>, Zhangpei Chen<sup>1</sup>, Jiwei**

4 **Wang<sup>3,\*</sup>, Jianshe Hu<sup>1,\*</sup>, Jing Guo<sup>2</sup>, Liqun Yang<sup>2,\*</sup>**

5 **Table of contents**

6 The supplementary information file includes, 10 supplementary Figures (Figures S1-S10), 3  
7 supplementary Table (Table S1-S3) and 4 supplementary movies (Movie S1-S4)

8 **Supplementary Figures**.....6

9 Fig. S1 FT-IR spectra.....6

10 Fig. S2 TGA curves ..... 6

11 Fig. S3 Loss factor ( $\tan \delta$ ) curves.....6

12 Fig. S4 Self-healing images.....7

13 Fig. S5 Images demonstrate the full recovery of the elastomer.....7

14 Fig. S6 Images demonstrate the full recovery of the elastomer with self-healing.....7

15 Fig. S7 (a) DSC curves of the monomer and initiator; (b) DSC curves of the obtained elastomers..7

16 Fig. S8 The storage ( $G'$ ) modulus of the elastomer P<sub>4</sub> with different self-healing time.....8

17 Figure S9 Optical microscopy images of the P<sub>4</sub> elastomer.....8

18

19 Figure S10 Shape memory behavior of the P<sub>2</sub> elastomer.....9

20 **Supplementary Table**

21 Table S1 Cross-Linking Density of P<sub>1</sub>-P<sub>4</sub> Sample.....9

22 Table S2 Mechanical properties of P<sub>1</sub>-P<sub>4</sub>  
23 results.....9

24 Table S3 Mechanical properties of the obtained elastomers exceeds almost all previously reported  
25 room-temperature elastomers.....10

26 **FTIR characterization**

27 The structure of the monomer and the elastomers were characterized by Fourier transform  
28 infrared spectroscopy (ATR-FTIR). As illustrated in Figure S1 (a), the peaks at 3033, 1607(1499),  
29 and 768(696) cm<sup>-1</sup> corresponded to stretching vibration of C-H on the benzene ring, stretching  
30 vibration of benzene ring skeleton and out-of-plane bending vibration of C-H on mono-substituted  
31 benzene, respectively. At the same time, MBC exhibited characteristic peaks at 1753, 1736, 1174  
32 and 1230(1132) cm<sup>-1</sup>, which corresponded to cocyclic ester carbonyl C=O double bond stretching  
33 vibration, ester carbonyl C=O double bond stretching vibration, cyclic ester stretching vibration of  
34 carbonyl C-O-C and antisymmetric and symmetrical stretching vibration of ester carbonyl C-O-C,  
35 respectively. The elastomers were shown in Figure S1 (b), it can be seen that the infrared spectra of  
36 P<sub>1</sub>-P<sub>4</sub> are similar. The characteristic peaks at 3033, 1753 and 1174 cm<sup>-1</sup> of the monomer were  
37 disappeared, this revealed that the monomer MBC had successfully ring-opened. Furthermore, the  
38 new peaks at 3400-3000 cm<sup>-1</sup> have appeared, and the peaks of the benzene ring of elastomers were  
39 enhanced, which indicated that the hydroxyl and hydrophobic associations of elastomers were  
40 established. Accordingly, the self-healing properties of the dual-physical cross-links of the  
41 elastomers were formed.

42 **Thermogravimetric analysis**

43 The TGA curves of the P<sub>1</sub>-P<sub>4</sub> elastomers with different catalyst were shown in Figure S2, the

44 decomposition temperature of the four elastomers about 300 °C show an upward trend as the catalyst  
45 content decreases, and the weight loss in the range of 300–400 °C, which has good thermal stability.  
46 This was attributed to the fact that the cross-linking density was increased as the catalyst content  
47 decreases when M:I was unchanged, M:C were changed, which will lead to promote hydrogen  
48 bonds and hydrophobic interactions were increased. Meanwhile, the energy of decomposition to  
49 destroy hydrogen bonding and hydrophobic association also was raised, resulting in the  
50 decomposition temperature is enhanced.

### 51 **The $T_g$ analysis**

52 The plot of the loss factor ( $\tan \delta$ ) against temperature indicates that the softening temperature  
53 of the elastomers are shown in Figure S3, the results showed that the peak of  $\tan \delta$  initially migrated  
54 to a high temperature with the decrease in catalyst content at a fixed frequency of 1 Hz, which may  
55 be explained by the reinforcement of the hydrophobic interactions and the stabilization of hydrogen  
56 bonds to activate the  $\tan \delta$  migrate to a high temperature. These results indicated that the  $T_g$  and  
57 strength of elastomers could be adjusted by the variation of the catalyst ratio. The elastomers showed  
58 the maximum softening temperature of 25.5 °C, below but close to 37 °C, thereby could be softened  
59 easily in 37 °C water (Figure 4A, Movie S3 (b) ), suggesting an excellent body-temperature  
60 sensitivity.

61 The thermal transitions of the obtained elastomers are further studied by differential scanning  
62 calorimetry (DSC) experiments in the temperature range of -50-200 °C. The DSC thermograms of  
63 the monomer and initiator, and the crosslinked elastomer are shown in Figure S7 (a) and Figure S7  
64 (b), respectively. The results show that the monomer shows the decomposition temperature ( $T_d$ ) of  
65 137.7 °C, the monomer and initiator exhibit the melting temperatures ( $T_m$ ) of 75.9 and 62.3 °C,

66 respectively. After polymerization, the  $T_d$  and  $T_m$  of the monomer is disappeared, the  $T_m$  of initiator  
67 is also disappeared, and indicating the monomer MBC had successfully ring-opened, without any  
68 by-product. The obtained elastomers have a relatively high  $T_g$  of 23.6-26.6°C, and the  $T_g$  of the  
69 elastomer slightly elevated as the content of catalyst is decreased. The  $T_g$  of the elastomers can be  
70 adjusted by the variation of the catalyst ratio.

### 71 **The surface topography of self-healing analysis**

72 All samples were tested for optical microscope, and the procedure of self-healing at room  
73 temperature, without requiring any external stimuli.

74 As shown in scratch tests (Figure S4), the P<sub>2</sub> as an example was discussed in detail. First,  
75 repeatability tests were carried out in order to accurately quantify the self-healing efficiency, the  
76 elastomer cylindrical (9 mm×9 mm) was cut into three completely separate pieces using a surgical  
77 blade. Then, the self-healing of the every sample had been completely cut and had applied a slightly  
78 force to dock softly the two cut interfaces. Second, a blade made 20-30 μm wide scratches on the  
79 elastomer (Figure S4 (a) ). Furthermore, optical microscopy images illustrated the artificial scratch  
80 made on the surface of the P<sub>2</sub> almost completely self-healing within 3 h at room temperature (Figure  
81 S4 (d) ). The results showed that the scratch had basically healed and was consistent with the tensile  
82 tests (Figure 5), this is because the non-covalent bonds between molecular chain segments are  
83 rearranged at the fracture interface.

84 In order to further study the effect of higher physical crosslink density on the self-healing of  
85 the obtained materials. The optical microscopy images and storage ( $G'$ ) modulus of the elastomer  
86 P<sub>4</sub> are illustrated in Figure S8 and Figure S9, respectively. The self-healing efficiency of 92.1% of  
87 the elastomer P<sub>4</sub>, after self-healing 2 h (Figure S8), which shows that the higher physical cross-

88 linking density of the materials has better self-healing capability. Secondly, a blade made 20-30  $\mu\text{m}$   
89 wide scratches on the elastomer P<sub>4</sub> (Figure S9 (a)). The artificial scratch made on the surface of the  
90 P<sub>4</sub> almost completely self-healing within 2 h at room temperature (Figure S9 (d)). The results  
91 indicated that the scratch had basically healed and was consistent with the dynamic mechanical  
92 (Figure S8), which confirm further the higher physical cross-linking density of the materials to  
93 obtain better behavior, including better self-healing capability and faster the rearrangement of non-  
94 covalent bonds between molecular chain segments at the fracture interface.

#### 95 **Shape memory behavior analysis**

96 Owing to the fact that the dual-physical cross-linked networks are introduced into the  
97 elastomers, it gives shape memory properties. The elastomers exhibited an outstanding self-recovery  
98 ability, the P<sub>2</sub> elastomer could recover its original state, and almost entirely within 2 min at room  
99 temperature after being stretched up to a given strain of 200% (Movie S1), without any environment  
100 treatment. The result showed that a potential the resistance of fatigue against repeated deformation.  
101 At the same time, self-recoverability was further evidenced by knotting, and no obvious residual  
102 strain was observed after unknotting and recovery to its original shape (Figure S5 (a)). Moreover,  
103 to further verify the ability of self-healing, reprogramming the permanent shape of the elastomers  
104 were performed. The detailed procedure to reprogram these new permanent shape “N, E, U” from  
105 the permanent linear shape (Figure S5 (b)). The original linear shape was erased after the  
106 reprogramming, the new reprogramming shape was formed (Movie S2 (a)). Then, The  
107 reprogramming of permanent shape was established by the re-association of hydrophobic  
108 interactions and the re-form of hydrogen bonds at room temperature. The self-recoverability of new  
109 shapes was demonstrated by knotting, and the reprogramming of permanent shape of the elastomers

110 could be quickly recovered within 2 min at room temperature (as an example, E shape was  
111 performed, Movie S2 (b)).

112 To qualitatively evaluate the shape memory properties and temperature responsiveness, P<sub>1</sub>-P<sub>4</sub>  
113 was made into 3 cm rod-shaped materials, and the plasticity was U-shaped under external force. [1-  
114 <sup>4]</sup> As shown in Figure 6 (a) and Movie S3 (a), Movie S3 (b), the P<sub>2</sub> elastomer was put into 7 °C ice  
115 water to fix shape for 10 s, and a 40 g weight was loaded for 10 s without deformation. Then, the  
116 fixed shape was immersed in 37 °C water for 10 s. The results showed that the elongation of P<sub>2</sub> was  
117 100% it could happen in response to human body-temperature, which was attributed to the  
118 temperature dependence of hydrogen bonds and hydrophobic associations of the dual-physical  
119 cross-linked network structure.

120 The quantitative evaluation of the shape memory behavior of the elastomer P<sub>2</sub> is obtained by  
121 dynamic thermodynamic analysis on a DMA (Q800, TA Instrument) to qualitatively evaluate  
122 further the shape memory behavior of the obtained materials and temperature responsiveness. As  
123 illustrated in Figure S 10, the dual-shape memory cycle of the obtained materials. The sample with  
124 cylindrical (ca. 6.000 mm (W) × 3 cm (L)) is uniaxially stretched to a strain of 40% at 15 °C and  
125 followed shape fixation at 28 °C for 1h. The results indicate that a fixation ratio of R<sub>f</sub>=79.5±2.6%  
126 and a recovery ratio of R<sub>r</sub>=94.0±2.0%, which would offer a guideline to synthesize high-  
127 performance shape memory materials.

## 128 Supporting Figures

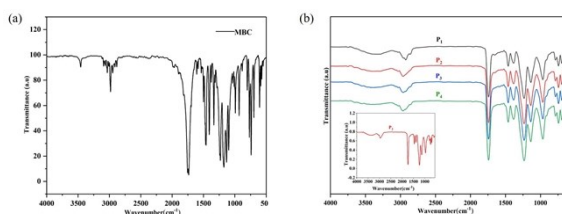

129

130 Figure S1 (a). FTIR spectra of the monomer. (b). FTIR spectra of the elastomers.

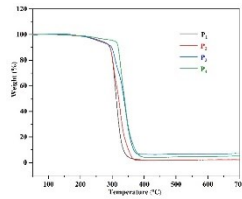

131

132 Figure S2. Thermogravimetric analysis of the elastomers

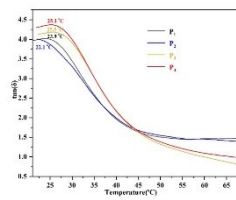

133

134 Figure S3. The loss factor ( $\tan \delta$ ) as a function of temperature for elastomers.

135

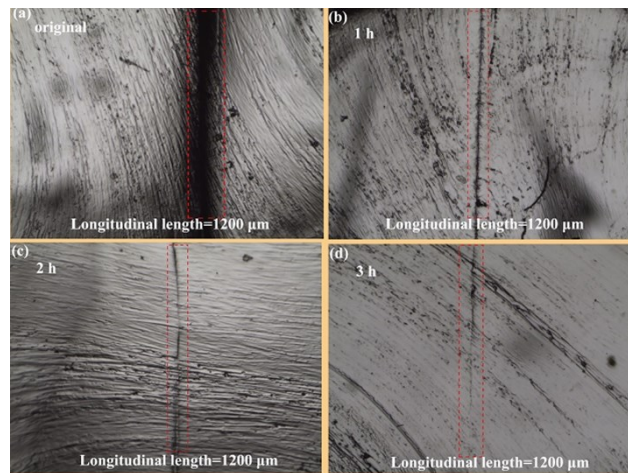

136

137 Figure S4 Optical microscopy images of the P<sub>2</sub> elastomer after being scratched. It showed a rapid

138 self-healing with an almost complete recovery within 3 h at room temperature

139

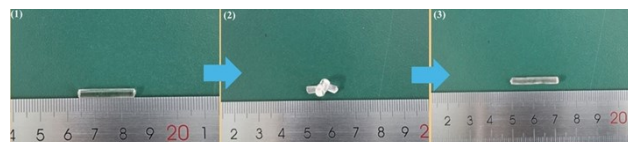

140 Figure S5 Images demonstrate the full recovery of a P<sub>2</sub> sample (size: 2.2 cm ×3mm) after knotting

141 without any break

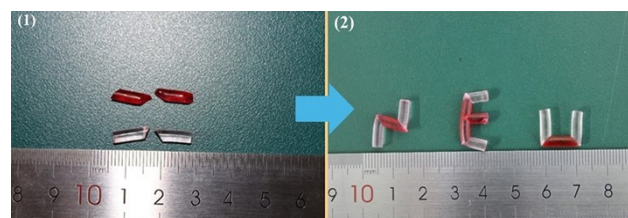

142

143

144

145 Figure S6 Images demonstrate the full recovery of a P<sub>2</sub> sample (size: 2.2 cm ×3mm) after self-

146 healing without any break

147

148

149

150

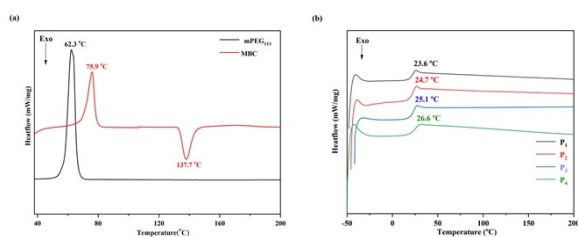

151 Figure S7. (a) DSC curves of the monomer and initiator; (b) DSC curves of the obtained elastomers.

152

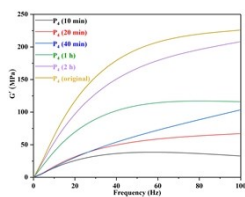

153

154 Figure S8. The storage (G') modulus of the elastomer P<sub>4</sub> with different self-healing time.

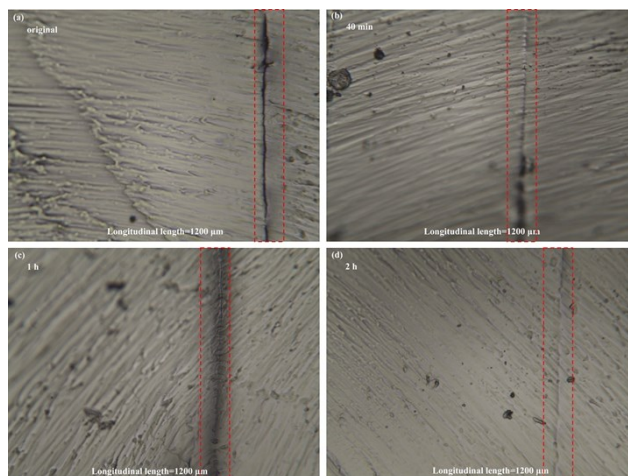

155

156 Figure S9 Optical microscopy images of the P<sub>4</sub> elastomer after being scratched. It showed a rapid



157 self-healing with an almost complete recovery within 2 h at room temperature

158

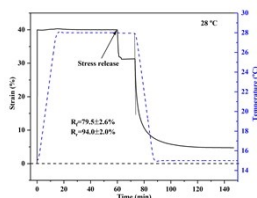

159

160 Figure S10 Shape memory behavior of the P<sub>2</sub> elastomer

161 **Table S1.** Polymer Density, Swelling Ratio, and Cross-Linking Density of P<sub>1</sub>-P<sub>4</sub> Sample<sup>a</sup>

| Samples        | Polymer density<br>(g/cm <sup>3</sup> ) | Swelling ratio<br>(%) | Cross-linking density<br>(10 <sup>-4</sup> mol/cm <sup>3</sup> ) |
|----------------|-----------------------------------------|-----------------------|------------------------------------------------------------------|
| P <sub>1</sub> | 0.66± 0.01                              | 302.3 ± 1.2           | 3.87 ± 0.05                                                      |
| P <sub>2</sub> | 0.78± 0.08                              | 229.7 ± 0.7           | 5.36 ± 0.02                                                      |
| P <sub>3</sub> | 0.80± 0.02                              | 182.2 ± 0.3           | 7.93 ± 0.01                                                      |
| P <sub>4</sub> | 0.84± 0.06                              | 143.2 ± 0.5           | 11.3 ± 0.03                                                      |

162 <sup>a</sup>The error in the table is standard deviation (3 specimens for each sample)

163

164 **Table S2.** Mechanical properties of elastomers with different catalyst content.

| Samples        | Elongation at break<br>(%) | Young's modulus<br>(MPa) | Tensile strength(MPa) |
|----------------|----------------------------|--------------------------|-----------------------|
| P <sub>1</sub> | 236.64± 11.00              | 4.43±0.18                | 10.50±0.25            |
| P <sub>2</sub> | 301.76± 8.61               | 4.13± 0.18               | 14.61±0.67            |
| P <sub>3</sub> | 407.37± 7.99               | 3.72± 0.23               | 14.88±0.6             |
| P <sub>4</sub> | 409.70± 5.97               | 3.66± 0.19               | 15.49±0.9             |

165

166

167 **Table S3.** Mechanical properties of the obtained elastomers exceeds almost all previously

168 reported room-temperature elastomers

| Reference | Maximum modulus(MPa) | Maximum tensile strength(MPa) | Journals                              |
|-----------|----------------------|-------------------------------|---------------------------------------|
| [3]       | 3                    | -                             | <i>Nature.</i> , 2010,                |
| [8]       | 0.1                  | -                             | <i>Adv. Mater.</i> , 2009             |
| [17]      | 80                   | 0.15                          | <i>Adv. Mater.</i> , 2016             |
| [18]      | 0.1                  | 0.28                          | <i>Adv. Funct. Mater.</i> , 2015      |
| [19]      | 175                  | 5.1±0.16                      | <i>ACS. App. Mater. Inter.</i> , 2019 |
| [20]      | 0.6                  | 0.06                          | <i>ACS. Macro. Lett.</i> , 2012       |
| [24]      | -                    | 14.8                          | <i>Adv. Mater.</i> , 2019             |
| [26]      | 0.01                 | 6.8                           | <i>Adv. Mater.</i> , 2018             |
| [35]      | 1.0                  | 3.5                           | <i>Macromolecules.</i> , 2016         |
| [38]      | 10                   | 4.5                           | <i>Adv. Funct. Mater.</i> , 2020      |
| [42]      | 0.1                  | 1.5                           | <i>Macromolecules.</i> , 2016         |

169 **Reference**

170 [1] Q. Zhao, H. J. Qi and T. Xie, *Prog. Polym. Sci.*, 2015, **49**, 79-120.

171 [2] Q. Zhao, W. Zou, Y. Luo and T. Xie, *Sci. Adv.*, 2016, **2**, e1501297.

172 [4] R. Liang, H. Yu, L. Wang, L. Lin, N. Wang and K. U. R. Naveed, *ACS. App. Mater. Inter.*, 2019,

173 **11**, 43563-43572.

174 [5] Y. K. Bai, J. W. Zhang and X. Chen, *ACS. App. Mater. Inter.*, 2018, **10**, 14017-14025.

175
